# Supplementary material
Source: publisher figshare collection journal article supplement (https://frontiersin.figshare.com/ndownloader/files/14991563)
Supplement: Supplementary file 1 [file 14991563]

## Sheet: Supplemental Table 2
	Accession numbers of reference single copy genes in BUSCO Protist Dataset
1	EPrGT00050000000570
2	EPrGT00050000000597
3	EPrGT00050000000633
4	EPrGT00050000000638
5	EPrGT00050000000656
6	EPrGT00050000000764
7	EPrGT00050000000788
8	EPrGT00050000000790
9	EPrGT00050000000821
10	EPrGT00050000000974
11	EPrGT00050000001261
12	EPrGT00050000001346
13	EPrGT00050000001368
14	EPrGT00050000001885
15	EPrGT00050000001927
16	EPrGT00050000002128
17	EPrGT00050000002199
18	EPrGT00050000002214
19	EPrGT00050000002346
20	EPrGT00050000002389
21	EPrGT00050000002690
22	EPrGT00050000003076
23	EPrGT00050000003160
24	EPrGT00050000003199
25	EPrGT00050000003303
26	EPrGT00050000003367
27	EPrGT00050000003603
28	EPrGT00050000003615
29	EPrGT00050000003868
30	EPrGT00050000004000
31	EPrGT00050000004283
32	EPrGT00050000004299
33	EPrGT00050000004774
34	EPrGT00050000004932
35	EPrGT00050000005003
36	EPrGT00050000005020
37	EPrGT00050000005111
38	EPrGT00050000005128
39	EPrGT00050000005182
40	EPrGT00050000005194
41	EPrGT00050000005290
42	EPrGT00050000005370
43	EPrGT00050000005427
44	EPrGT00050000005459
45	EPrGT00050000005482
46	EPrGT00050000005485
47	EPrGT00050000005498
48	EPrGT00050000005502
49	EPrGT00050000005514
50	EPrGT00050000005516
51	EPrGT00050000005533
52	EPrGT00050000005562
53	EPrGT00050000005659
54	EPrGT00050000005687
55	EPrGT00050000005714
56	EPrGT00050000005721
57	EPrGT00050000005732
58	EPrGT00050000005743
59	EPrGT00050000005769
60	EPrGT00050000005798
61	EPrGT00050000005800
62	EPrGT00050000005808
63	EPrGT00050000005840
64	EPrGT00050000005852
65	EPrGT00050000005857
66	EPrGT00050000005939
67	EPrGT00050000005940
68	EPrGT00050000005954
69	EPrGT00050000005966
70	EPrGT00050000005995
71	EPrGT00050000006007
72	EPrGT00050000006026
73	EPrGT00050000006045
74	EPrGT00050000006077
75	EPrGT00050000006107
76	EPrGT00050000006117
77	EPrGT00050000006133
78	EPrGT00050000007812
79	EPrGT00080000010433
80	EPrGT00180000031570
81	EPrGT00300000062292
82	EPrGT00300000062307
83	EPrGT00300000062326
